# Supplementary material
Source: ML conference proceedings conference paper supplement (https://aclanthology.org/D19-1032)
Supplement: Attachment [file D19-1032.Attachment.zip]

## A Appendix

In the appendix, we incorporate the following details that are omitted in the main body due to the space limit.

- Section A.1 presents event type specifications and corresponding preprocessing details.
- Section A.2 includes the hyper-parameter setting that we use to run experiments.
- Section A.3 provides pseudo codes to facilitate understanding of the EDAG generation.
- Section A.4 complements additional evaluation results for entity extraction and event triggering.
- Section A.5 studies another three sophisticated cases to intuitively illustrate necessities and advantages of end-to-end modeling.

### A.1 Event Type Specifications

Table 1 shows detailed illustrations for event types used in our paper, where we mark some key roles that should be non-empty when conducting the document-level event labeling. In addition to requiring non-empty key roles, we empirically set the minimum number of matched roles for EF, ER, EU, EO and EP events as 5, 4, 4, 4 and 5, respectively. Though we set these constraints empirically when processing our data, practitioners of other domains can adjust these configurations freely to fulfill the task-specific requirements by making a desirable trade-off between precision and recall.

### A.2 Hyper-parameters Setting

We summarize all hyper-parameters in Table 2 to be reproducible.

Moreover, when training models, we follow the decreasing order of the non-empty arguments ratio of the role, based on the intuition that more informative (non-empty) arguments in the path history can facilitate better subsequent argument identifications during the recurrent decoding, and we also validate this intuition by comparing with models trained on some randomly permuted role orders.

### A.3 Pseudo Codes for the EDAG Generation

We provide pseudo codes about how to calculate the EDAG loss for a given EDAG structure (Algorithm 1) and how to generate an EDAG at inference (Algorithm 2) to facilitate better understanding of the EDAG generation.

### A.4 Additional Evaluation Results

In the main body, we show the end-to-end evaluation results of DEE for different models when facing *arguments-scattering* and *multi-event* challenges. Here, Table 3 complemented both evaluation results and corresponding analyses for entity extraction and event triggering, two preceding sub-tasks before filling the event table.

### A.5 Case Studies

In addition to the *Equity Pledge* example included by the paper, we show another three cases in Figure 1, 2 and 3 for the *Equity Overweight*, *Equity Underweight* and *Equity Freeze* events, respectively, to intuitively illustrate why Doc2EDAG, the truly end-to-end model, is better. For all figures, we color the wrong predicted arguments as red and present detailed explanations.

| Event Type              | Event Role                                                                                                                                                                                                                              | Detailed Explanations                                                                                                                                                                                                                                                                                                                                                                                                                                            |
|-------------------------|-----------------------------------------------------------------------------------------------------------------------------------------------------------------------------------------------------------------------------------------|------------------------------------------------------------------------------------------------------------------------------------------------------------------------------------------------------------------------------------------------------------------------------------------------------------------------------------------------------------------------------------------------------------------------------------------------------------------|
| Equity Freeze (EF)      | <b>Equity Holder</b> (key)<br><b>Froze Shares</b> (key)<br><b>Legal Institution</b> (key)<br><b>Start Date</b><br><b>End Date</b><br><b>Unfroze Date</b><br><b>Total Holding Shares</b><br><b>Total Holding Ratio</b>                   | the equity holder whose shares are froze<br>the number of shares being froze<br>the legal institution that executes this freeze<br>the start date of this freeze<br>the end date of this freeze<br>the date in which these shares are unfroze<br>the total number of shares being hold at disclosing time<br>the total ratio of shares being hold at disclosing time                                                                                             |
| Equity Repurchase (ER)  | <b>Company Name</b> (key)<br><b>Highest Trading Price</b><br><b>Lowest Trading Price</b><br><b>Closing Date</b><br><b>Repurchased Shares</b><br><b>Repurchase Amount</b>                                                                | the name of the company<br>the highest trading price<br>the lowest trading price<br>the closing date of this disclosed repurchase<br>the number of shares being repurchased before the closing date<br>the repurchase amount before the closing date                                                                                                                                                                                                             |
| Equity Underweight (EU) | <b>Equity Holder</b> (key)<br><b>Traded Shares</b> (key)<br><b>Start Date</b><br><b>End Date</b><br><b>Average Price</b><br><b>Later Holding Shares</b>                                                                                 | the equity holder who conducts this underweight<br>the number of shares being traded<br>the start date of this underweight<br>the end date of this underweight<br>the average price during this underweight<br>the number of shares being hold after this underweight                                                                                                                                                                                            |
| Equity Overweight (EO)  | <b>Equity Holder</b> (key)<br><b>Traded Shares</b> (key)<br><b>Start Date</b><br><b>End Date</b><br><b>Average Price</b><br><b>Later Holding Shares</b>                                                                                 | the equity holder who conducts this overweight<br>the number of shares being traded<br>the start date of this overweight<br>the end date of this overweight<br>the average price during this overweight<br>the number of shares being hold after this overweight                                                                                                                                                                                                 |
| Equity Pledge (EP)      | <b>Pledger</b> (key)<br><b>Pledged Shares</b> (key)<br><b>Pledgee</b> (key)<br><b>Start Date</b><br><b>End Date</b><br><b>Released Date</b><br><b>Total Pledged Shares</b><br><b>Total Holding Shares</b><br><b>Total Holding Ratio</b> | the equity holder who pledges some shares to an institution<br>the number of shares being pledged<br>the institution who accepts the pledged shares<br>the start date of this pledge<br>the end date of this pledge<br>the date in which these pledged shares are released<br>the total number of shares being pledged at disclosing time<br>the total number of shares being hold at disclosing time<br>the total ratio of shares being hold at disclosing time |

Table 1: Event type specifications.

| Module               | Hyper-parameter                                                                                                                                                                                                                                                                                                              | Value                                                                                                                                                                                         |
|----------------------|------------------------------------------------------------------------------------------------------------------------------------------------------------------------------------------------------------------------------------------------------------------------------------------------------------------------------|-----------------------------------------------------------------------------------------------------------------------------------------------------------------------------------------------|
| Input Representation | the maximum sentence number<br>the maximum sentence length<br>$d_w$ (the embedding size)                                                                                                                                                                                                                                     | 64<br>128<br>768                                                                                                                                                                              |
| Entity Recognition   | the tagging scheme<br>the hidden size                                                                                                                                                                                                                                                                                        | BIO (Begin, Inside, Other)<br>768 (same to $d_w$ )                                                                                                                                            |
| Transformer-1        | the number of layers                                                                                                                                                                                                                                                                                                         | 4                                                                                                                                                                                             |
| Transformer-2        | the size of the hidden layer                                                                                                                                                                                                                                                                                                 | 768 (same to $d_w$ )                                                                                                                                                                          |
| Transformer-3        | the size of the feed-forward layer                                                                                                                                                                                                                                                                                           | 1,024                                                                                                                                                                                         |
| Optimization         | the optimizer<br>the learning rate<br>the batch size<br>the training epoch<br>the loss reduction type<br>$\lambda_1$<br>$\lambda_2, \lambda_3$<br>$\gamma$<br>the dropout probability<br>the scheduled-sampling beginning<br>the scheduled-sampling ending<br>the scheduled probability of employing<br>gold entity mentions | Adam<br>$1e^{-4}$<br>64 (with 32 P40 GPUs)<br>100<br>sum<br>0.05<br>0.95<br>3<br>0.1<br>$10^{th}$ epoch<br>$20^{th}$ epoch<br>decreasing from 1.0 to 0.1 linearly during the scheduled epochs |

Table 2: The hyper-parameter setting.

---

**Algorithm 1:** Pseudo codes to calculate the loss for the EDAG generation

---

**Input:** the EDAG structure  $\mathcal{G}$  for each triggered event, the entity tensor  $e^d = [e_1^d, \dots, e_{N_e}^d]$ , the sentence tensor  $c^d = [c_1^d, \dots, c_{N_s}^d]$ ;  
**Output:** the EDAG generation loss  $L_{dag}$ ;  
Initialize the loss  $L_{dag} = 0$ ;  
**for** each event type **do**  
    **if** is triggered **then**  
        Initialize the memory tensor of the virtual starting node as  $c^d$ ;  
        **for** each role type following the predefined order **do**  
            **for** each entity node of the last role in  $\mathcal{G}$  **do**  
                Look up the memory tensor of this node as  $m_t$ ;  
                Get path-expanding labels from  $\mathcal{G}$ ;  
                Calculate the path-expanding classification loss  $L_{pe}$ ;  
                Update the EDAG generation loss as  $L_{dag} = L_{dag} + L_{pe}$ ;  
                **for** each entity  $i$  known to be expanded in the current role **do**  
                    Set the memory tensor for the corresponding entity node of the current role as  $[m_t, e_i^d]$ ;  
                **end**  
            **end**  
        **end**  
    **end**  
**end**

---

---

**Algorithm 2:** Pseudo codes to generate an EDAG at inference

---

**Input:** the entity tensor  $e^d = [e_1^d, \dots, e_{N_e}^d]$ , the sentence tensor  $c^d = [c_1^d, \dots, c_{N_s}^d]$ ;  
**Output:** the EDAG structure for each triggered event;  
**for** each event type **do**  
    **if** is triggered **then**  
        Initialize the EDAG structure with a virtual starting node;  
        Initialize the memory tensor of the virtual starting node as  $c^d$ ;  
        **for** each role type following the predefined order **do**  
            **for** each leaf node of the current EDAG **do**  
                Look up the memory tensor of this node as  $m_t$ ;  
                Get path-expanding predictions;  
                **for** each entity  $i$  predicted to be expanded in the current role **do**  
                    Create a new node of entity  $i$  for the current role;  
                    Update the EDAG structure by connecting the leaf node to the new entity node;  
                    Set the memory tensor of that new node as  $[m_t, e_i^d]$ ;  
                **end**  
            **end**  
        **end**  
    **end**  
**end**

---

| Model     | Entity Extraction |      |      | EF Triggering |      |      | ER Triggering |      |      | EU Triggering |      |      | EO Triggering |      |      | EP Triggering |       |      |
|-----------|-------------------|------|------|---------------|------|------|---------------|------|------|---------------|------|------|---------------|------|------|---------------|-------|------|
|           | P.                | R.   | F1   | P.            | R.   | F1   | P.            | R.   | F1   | P.            | R.   | F1   | P.            | R.   | F1   | P.            | R.    | F1   |
| DCFEE-O   | 87.7              | 90.8 | 89.3 | 99.3          | 72.1 | 83.5 | 100.0         | 90.7 | 95.1 | 95.5          | 68.1 | 79.5 | 97.0          | 66.2 | 78.7 | 98.7          | 88.7  | 93.4 |
| DCFEE-M   | 88.5              | 90.3 | 89.4 | 99.3          | 66.7 | 79.8 | 100.0         | 88.0 | 93.6 | 95.7          | 63.8 | 76.6 | 94.3          | 71.7 | 81.4 | 98.5          | 86.4  | 92.1 |
| GreedyDec | 89.0              | 89.7 | 89.3 | 100.0         | 98.5 | 99.3 | 100.0         | 99.8 | 99.9 | 97.2          | 98.2 | 97.7 | 99.1          | 95.1 | 97.1 | 99.0          | 99.8  | 99.4 |
| Doc2EDAG  | 89.0              | 89.6 | 89.3 | 100.0         | 99.5 | 99.8 | 100.0         | 99.6 | 99.8 | 97.9          | 97.9 | 97.9 | 97.3          | 94.8 | 96.0 | 99.4          | 100.0 | 99.7 |

Table 3: Evaluation results of entity extraction and event triggering for each event type on the test set, where we can observe that 1) different models produce roughly consistent entity-extraction performance, which corresponds to our setting that all models share the same architecture when extracting entities; 2) the document-level event triggering is superior to the sentence-level event triggering (key-event sentence detection used in DCFEE), because both the DS-based labeling and the event-triggering learning can be more accurate and robust at the document level, and the assumption to identify key-event sentences used by DCFEE is hard to fit all event types well.

| Event Table (DCFEE-O, key sentences: 3) |               |            |          |                      |               | Event Table (Our Model) |               |            |          |                      |               |
|-----------------------------------------|---------------|------------|----------|----------------------|---------------|-------------------------|---------------|------------|----------|----------------------|---------------|
| Equity Holder                           | Traded Shares | Start Date | End Date | Later Holding Shares | Average Price | Equity Holder           | Traded Shares | Start Date | End Date | Later Holding Shares | Average Price |
| [PER1]                                  | [SHARE1]      | [DATE1]    | NA       | [SHARE4]             | NA            | [PER1]                  | [SHARE1]      | [DATE1]    | [DATE1]  | NA                   | NA            |
|                                         |               |            |          |                      |               | [PER2]                  | [SHARE2]      | [DATE1]    | [DATE1]  | [SHARE2]             | NA            |
|                                         |               |            |          |                      |               | [PER3]                  | [SHARE1]      | [DATE1]    | [DATE1]  | NA                   | NA            |

  

| Event Table (DCFEE-M, key sentences: 3) |               |            |          |                      |               | Event Table (Ground-truth) |               |            |          |                      |               |
|-----------------------------------------|---------------|------------|----------|----------------------|---------------|----------------------------|---------------|------------|----------|----------------------|---------------|
| Equity Holder                           | Traded Shares | Start Date | End Date | Later Holding Shares | Average Price | Equity Holder              | Traded Shares | Start Date | End Date | Later Holding Shares | Average Price |
| [PER1]                                  | [SHARE1]      | [DATE1]    | NA       | [SHARE4]             | NA            | [PER1]                     | [SHARE1]      | [DATE1]    | [DATE1]  | [SHARE4]             | NA            |
| [PER2]                                  | [SHARE2]      | [DATE1]    | NA       | [SHARE4]             | NA            | [PER2]                     | [SHARE2]      | [DATE1]    | [DATE1]  | [SHARE2]             | NA            |
| [PER3]                                  | [SHARE3]      | [DATE1]    | NA       | [SHARE4]             | NA            | [PER3]                     | [SHARE3]      | [DATE1]    | [DATE1]  | [SHARE5]             | NA            |

  

| Entity Mark Table |             |                  | ID | Sentence                                                                                                                                                                                                                                                                                                                                                                                                                                                                                                                                                                                                  |
|-------------------|-------------|------------------|----|-----------------------------------------------------------------------------------------------------------------------------------------------------------------------------------------------------------------------------------------------------------------------------------------------------------------------------------------------------------------------------------------------------------------------------------------------------------------------------------------------------------------------------------------------------------------------------------------------------------|
| Mark              | Entity      | Entity (English) |    |                                                                                                                                                                                                                                                                                                                                                                                                                                                                                                                                                                                                           |
| [PER1]            | 李兵          | Bing Li          | 3  | 公司接到通知，[DATE1]，公司董事、总经理[PER1]先生通过深圳证券交易所证券交易系统增持公司[SHARE1]股份，公司财务负责人[PER2]先生通过深圳证券交易所证券交易系统增持公司[SHARE2]股份，公司董事会秘书[PER3]先生通过深圳证券交易所证券交易系统增持公司[SHARE3]股份。<br>The company was informed that, in [DATE1], Mr. [PER1], the director and the general manager of the company, bought [SHARE1] of the company via the trading system of Shenzhen Stock Exchange, Mr. [PER2], the finance manager, bought [SHARE2] of the company via the trading system of Shenzhen Stock Exchange, and Mr. [PER3], the secretary of the board, bought [SHARE3] of the company via the trading system of Shenzhen Stock Exchange. |
| [PER2]            | 毛尊平         | Zunping Mao      |    |                                                                                                                                                                                                                                                                                                                                                                                                                                                                                                                                                                                                           |
| [PER3]            | 夏保琪         | Baoqi Xia        |    |                                                                                                                                                                                                                                                                                                                                                                                                                                                                                                                                                                                                           |
| [SHARE1]          | 30000股      | 30000 shares     | 7  | 本次增持后，[PER1]先生共持有公司[SHARE4]股份。<br>After this overweight, Mr. [PER1] hold [SHARE4] of the company in total.                                                                                                                                                                                                                                                                                                                                                                                                                                                                                                |
| [SHARE2]          | 20000股      | 20000 shares     |    |                                                                                                                                                                                                                                                                                                                                                                                                                                                                                                                                                                                                           |
| [SHARE3]          | 17300股      | 17300 shares     | 8  | 本次增持后，[PER2]先生共持有公司[SHARE2]股份。<br>After this overweight, Mr. [PER2] hold [SHARE2] of the company in total.                                                                                                                                                                                                                                                                                                                                                                                                                                                                                                |
| [SHARE4]          | 63750股      | 63750 shares     |    |                                                                                                                                                                                                                                                                                                                                                                                                                                                                                                                                                                                                           |
| [SHARE5]          | 20675股      | 20675 shares     | 10 | 本次增持后，[PER3]先生共持有公司[SHARE5]股份。<br>After this overweight, Mr. [PER3] hold [SHARE5] of the company in total.                                                                                                                                                                                                                                                                                                                                                                                                                                                                                                |
| [DATE1]           | 2018年12月21日 | Dec. 21st, 2018  |    |                                                                                                                                                                                                                                                                                                                                                                                                                                                                                                                                                                                                           |

Figure 1: In this case, there are three *equity overweight* (EO) events mentioned by the documents. Although DCFEE-O correctly identifies the key sentence (ID 3), it cannot decide how many events being expressed by this sentence, as its SEE module can only fulfill the sequence tagging task. Therefore, we implement another version, DCFEE-M, which guess possible events by the position closeness, and indeed DCFEE-M produce multiple partially correct events in this case. However, the arguments-completion stage of DCFEE-M is context-agnostic, which is the reason that DCFEE-M does not produce correct arguments for the *End Date* role (“DATE1” is already assigned with the *Start Date* role) and the *Later Holding Shares* role (the closest valid entity is “[SHARE4]”). Moreover, though achieving better results for this case, DCFEE-M is inferior to DCFEE-O in terms of the whole test set (shown in the paper), since the naive multi-event guessing fails on many other cases, such as the case shown in Figure 2. Since our model can perform the end-to-end context-aware inference, it produces much better results than existing solutions, though it also misses two arguments for the *Later Holding Shares* role. After the careful examination, we find that the empty ratio of this role is pretty high during training, and thus our model prefers to be conservative in assigning entities with this role. This case also implies that there still exists some promotion spaces for the Doc2EDAG paradigm.

| Event Table (DCFEE-O, key sentences: 4, 6, 8) |               |            |          |                      |               |
|-----------------------------------------------|---------------|------------|----------|----------------------|---------------|
| Equity Holder                                 | Traded Shares | Start Date | End Date | Later Holding Shares | Average Price |
| [PER1]                                        | [SHARE1]      | [DATE2]    | [DATE3]  | NA                   | NA            |
| [PER1]                                        | [SHARE1]      | [DATE2]    | [DATE3]  | NA                   | NA            |
| [PER1]                                        | [SHARE1]      | [DATE2]    | [DATE3]  | NA                   | NA            |

| Event Table (Our Model) |               |            |          |                      |               |
|-------------------------|---------------|------------|----------|----------------------|---------------|
| Equity Holder           | Traded Shares | Start Date | End Date | Later Holding Shares | Average Price |
| [PER1]                  | [SHARE1]      | [DATE2]    | [DATE2]  | NA                   | NA            |
| [PER1]                  | [SHARE3]      | [DATE3]    | [DATE3]  | NA                   | NA            |

| Event Table (DCFEE-M, key sentences: 4, 6, 8) |               |            |          |                      |               |
|-----------------------------------------------|---------------|------------|----------|----------------------|---------------|
| Equity Holder                                 | Traded Shares | Start Date | End Date | Later Holding Shares | Average Price |
| [PER1]                                        | [SHARE1]      | [DATE2]    | [DATE3]  | NA                   | NA            |
| [PER1]                                        | [SHARE1]      | [DATE2]    | [DATE1]  | NA                   | NA            |
| [PER1]                                        | [SHARE1]      | [DATE3]    | [DATE1]  | NA                   | NA            |
| [PER1]                                        | [SHARE3]      | [DATE2]    | [DATE1]  | NA                   | NA            |
| [PER1]                                        | [SHARE1]      | [DATE2]    | [DATE1]  | NA                   | NA            |
| [PER1]                                        | [SHARE5]      | [DATE2]    | [DATE1]  | NA                   | NA            |

| Event Table (Ground-truth) |               |            |          |                      |               |
|----------------------------|---------------|------------|----------|----------------------|---------------|
| Equity Holder              | Traded Shares | Start Date | End Date | Later Holding Shares | Average Price |
| [PER1]                     | [SHARE1]      | [DATE2]    | [DATE2]  | [SHARE5]             | NA            |
| [PER1]                     | [SHARE3]      | [DATE3]    | [DATE3]  | [SHARE6]             | NA            |

| Entity Mark Table |             |                                |
|-------------------|-------------|--------------------------------|
| Mark              | Entity      | Entity (English)               |
| [ORG1]            | 通裕重工股份有限公司  | Tongyu Heavy Industry Co.,Ltd. |
| [PER1]            | 朱金枝         | Jinzhi Zhu                     |
| [DATE1]           | 2018年10月10日 | Oct. 10th, 2018                |
| [DATE2]           | 2014年6月23日  | Jun. 23rd, 2014                |
| [DATE3]           | 2018年9月28日  | Sept. 28th, 2018               |
| [SHARE1]          | 8000000股    | 8000000 shares                 |
| [SHARE2]          | 9000000000股 | 9000000000 shares              |
| [SHARE3]          | 120900000股  | 120900000 shares               |
| [SHARE4]          | 80075625股   | 80075625 shares                |
| [SHARE5]          | 72075625股   | 72075625 shares                |
| [SHARE6]          | 204136875股  | 204136875 shares               |
| [RATIO1]          | 5%          | 5%                             |
| [RATIO2]          | 1%          | 1%                             |
| [RATIO3]          | 0.8889%     | 0.8889%                        |
| [RATIO4]          | 0.3700%     | 0.3700%                        |
| [RATIO5]          | 8.8973%     | 8.8973%                        |

| ID | Sentence                                                                                                                                                                                                                                                                                                                                                                                                                                                                                                                                                                                       |
|----|------------------------------------------------------------------------------------------------------------------------------------------------------------------------------------------------------------------------------------------------------------------------------------------------------------------------------------------------------------------------------------------------------------------------------------------------------------------------------------------------------------------------------------------------------------------------------------------------|
| 4  | [DATE1]. [ORG1] (以下简称“通裕重工”或“本公司”)收到持股[RATIO1]以上股东[PER1]先生发来的《关于减持通裕重工股份达到[RATIO2]的通知》, 自[DATE2]至[DATE3], [PER1]先生通过大宗交易方式减持公司无限售流通股, ....., 具体情况如下:<br>In [DATE1], [ORG1] (abbreviated as “Tongyu Heavy Industries” or “the company”) received the “Notifications on that reduced holding-share ratio of Tongyu Heavy Industries reached [RATIO2]” from the shareholder Mr. [PER1], who hold the company equities more than [RATIO1], which stated that from [DATE2] to [DATE3], [PER1] sold some shares of the company via the block trading, ....., the detailed information is as follows: |
| 5  | 一、股东减持情况<br>First, the information of this equity underweight                                                                                                                                                                                                                                                                                                                                                                                                                                                                                                                                  |
| 6  | [PER1]先生于[DATE2]通过大宗交易方式减持[SHARE1], 占公司当时总股本[SHARE2]的比例为[RATIO3]; [DATE3]减持[SHARE3], 占公司目前总股本的比例为[RATIO4].<br>In [DATE2], Mr. [PER1] sold [SHARE1] via the block trading, accounting for [RATIO3] of the capital stock of the company at that time; in [DATE3], he sold [SHARE3] again, accounting for [RATIO4] of the capital stock of the company currently.                                                                                                                                                                                                                                 |
| 7  | 二、本次减持前后持股情况<br>Second, the holding information before and after this equity underweight                                                                                                                                                                                                                                                                                                                                                                                                                                                                                                       |
| 8  | 本次减持前, [PER1]先生持有本公司股份[SHARE4], 占公司总股本[SHARE2]的[RATIO5], [DATE2]减持[SHARE1]后持股[SHARE5], ....., [DATE3][PER1]先生减持[SHARE3]后持有[SHARE6], .....<br>Before this underweight, [PER1] hold [SHARE4] of the company, accounting for [RATIO5] of the total capital stock of the company, [SHARE2]; while in [DATE2], after selling [SHARE1], he hold [SHARE5] of the company, ....., in [DATE3], after selling [SHARE3], Mr. [PER1] hold [SHARE6] of the company. ...                                                                                                                                     |

Figure 2: This case shows the typical false positive errors made by DCFEE models. Although the document only contains two distinct *Equity Underweight* events in total, different sentences mention these events multiple times (ID 4, 6 and 8). However, the key-sentence detection module of DCFEE models cannot differentiate duplicated event mentions elegantly. Therefore, both of them produce duplicated event records. Especially, DCFEE-M, guessing multiple event mentions from a single sentence, suffers severe false positive errors in this case. In contrast, our model is naturally robust to such data characteristics, since we conduct the event table filling at the document level. The only missing arguments, belong to the *Later Holding Shares* role, are partially caused by the restriction of the maximum sentence length at the input stage (ID 8).

| Event Table (DCFEE-O, key sentences: 14) |              |                   |            |          |              |                      |                     |
|------------------------------------------|--------------|-------------------|------------|----------|--------------|----------------------|---------------------|
| Equity Holder                            | Froze Shares | Legal Institution | Start Date | End Date | Unfroze Date | Total Holding Shares | Total Holding Ratio |
| [PER1]                                   | [SHARE2]     | [ORG3]            | [DATE1]    | NA       | NA           | [SHARE1]             | [RATIO2]            |

| Event Table (Our Model) |              |                   |            |          |              |                      |                     |
|-------------------------|--------------|-------------------|------------|----------|--------------|----------------------|---------------------|
| Equity Holder           | Froze Shares | Legal Institution | Start Date | End Date | Unfroze Date | Total Holding Shares | Total Holding Ratio |
| [ORG2]                  | [SHARE1]     | [ORG3]            | [DATE1]    | NA       | NA           | [SHARE1]             | [RATIO2]            |
| [PER1]                  | [SHARE2]     | [ORG3]            | [DATE1]    | NA       | NA           | [SHARE2]             | NA                  |

| Event Table (DCFEE-M, key sentences: 14) |              |                   |            |          |              |                      |                     |
|------------------------------------------|--------------|-------------------|------------|----------|--------------|----------------------|---------------------|
| Equity Holder                            | Froze Shares | Legal Institution | Start Date | End Date | Unfroze Date | Total Holding Shares | Total Holding Ratio |
| [PER1]                                   | [SHARE2]     | [ORG3]            | [DATE1]    | NA       | NA           | [SHARE1]             | [RATIO2]            |

| Event Table (Ground-truth) |              |                   |            |          |              |                      |                     |
|----------------------------|--------------|-------------------|------------|----------|--------------|----------------------|---------------------|
| Equity Holder              | Froze Shares | Legal Institution | Start Date | End Date | Unfroze Date | Total Holding Shares | Total Holding Ratio |
| [ORG2]                     | [SHARE1]     | [ORG3]            | [DATE1]    | NA       | NA           | [SHARE1]             | [RATIO2]            |
| [PER1]                     | [SHARE2]     | [ORG3]            | [DATE1]    | NA       | NA           | [SHARE2]             | [RATIO3]            |

| Entity Mark Table |                |                                                        |
|-------------------|----------------|--------------------------------------------------------|
| Mark              | Entity         | Entity (English)                                       |
| [DATE1]           | 2018年11月1日     | Nov. 1st, 2018                                         |
| [ORG1]            | 上海富控互动娱乐股份有限公司 | Shanghai Fukong Interactive Entertainment Co., Ltd.    |
| [ORG2]            | 上海富控文化传媒 有限公司  | Shanghai Fukong Culture Media Co., Ltd.                |
| [ORG3]            | 山东省济南市中级人民法院   | Jinan Intermediate People's Court of Shandong Province |
| [PER1]            | 顾静刚            | Jinggang Yan                                           |
| [SHARE1]          | 157876590股     | 157876590 shares                                       |
| [SHARE2]          | 31825000股      | 31825000 shares                                        |
| [RATIO2]          | 27.42%         | 27.42%                                                 |
| [RATIO3]          | 5.53%          | 5.53%                                                  |

| ID | Sentence                                                                                                                                                                                                                                                                                                                                                                                                            |
|----|---------------------------------------------------------------------------------------------------------------------------------------------------------------------------------------------------------------------------------------------------------------------------------------------------------------------------------------------------------------------------------------------------------------------|
| 3  | [ORG1]（以下简称“公司”）于[DATE1]获悉公司控股股东[ORG2]（以下简称“富控传媒”）和公司实际控制人[PER1]先生持有的公司股份被司法轮候冻结，具体情况如下：                                                                                                                                                                                                                                                                                                                            |
| 4  | 一、控股股东股份被冻结情况<br>First, the information about the controlling shareholder being froze                                                                                                                                                                                                                                                                                                                               |
| 5  | 司法轮候冻结机关：[ORG3]；<br>The legal institution conducting this freeze: [ORG3]；                                                                                                                                                                                                                                                                                                                                           |
| 6  | 司法轮候冻结数量为：[SHARE1]，轮候冻结；<br>The number of shares being froze: [SHARE1], froze in turn;                                                                                                                                                                                                                                                                                                                              |
| 7  | 冻结起始日：[DATE1]；<br>The start date of this freeze: [DATE1]；                                                                                                                                                                                                                                                                                                                                                           |
| 9  | 二、实际控制人股份被冻结情况<br>Second, the information about the actual controller being froze                                                                                                                                                                                                                                                                                                                                   |
| 10 | 司法轮候冻结机关：[ORG3]；<br>The legal institution conducting this freeze: [ORG3]；                                                                                                                                                                                                                                                                                                                                           |
| 11 | 司法轮候冻结数量为：[SHARE2]，轮候冻结；<br>The number of shares being froze: [SHARE2], froze in turn;                                                                                                                                                                                                                                                                                                                              |
| 12 | 冻结起始日：[DATE1]；<br>The start date of this freeze: [DATE1]；                                                                                                                                                                                                                                                                                                                                                           |
| 14 | 截至本公告披露日，富控传媒持有公司[SHARE1]，占公司总股本的[RATIO1]，已被轮候冻结[SHARE1]；[PER1]先生持有公司[SHARE2]，占公司总股本的[RATIO2]，已被轮候冻结[SHARE2]。<br>As of the date of this announcement, Fukong Media hold [SHARE1] of the company, accounting for [RATIO1] of the total share capital, where [SHARE1] is froze in turn; Mr. [PER1] hold [SHARE2] of the company, accounting for [RATIO2] of the total share capital, where [SHARE2] is froze in turn; |

Figure 3: This case, containing two *Equity Freeze* events, is a typical example that violates the key-sentence labeling assumption of DCFEE, which assumes the sentence containing the most arguments as the key-event one. We can observe that the core arguments of the event scatter across multiple sub-sentences, such as ID 5, 6, 7, 10, 11 and 12, but DCFEE-O and DCFEE-M treat the summary sentence (ID 14) as the key-event one. However, the single sentence (ID 14) summarizes these two event records, and DCFEE models cannot address such multi-event sentences elegantly. Note that, each text snippet of ID 5, 6, 7, 10, 11 and 12 is not a complete sentence, but these text snippets are presented in a list manner and some of them even do not have ending punctuations (ID 4, 9). We have tried to merge such short snippets into a single long sentence, but applying this merge on the whole dataset can hurt the performance of DCFEE models on other event types. Thus, we drop this preprocessing option. In contrast, our model is immune to such merging and even benefit with a faster speed due to fewer sentences to be encoded. In terms of the extraction performance, our model correctly identifies these two events and arranges entities into proper table columns with only one missing argument for the *Total Holding Ratio* role. While DCFEE models miss one event and inevitably make mistakes when completing missing arguments for the key-event sentence.
